# Supplementary material for: Rapid, Precise, and Accurate Counts of Symbiodinium Cells Using the Guava Flow Cytometer, and a Comparison to Other Methods
Source: PubMed Central journal article supplement (PMC4546242; doi:10.1371/journal.pone.0135725), 2015-08-20
Supplement: pone.0135725.s003.pdf [file pone.0135725.s003.pdf]

# S1\_File. Supplemental Materials and Methods

## Methods for Dinofinder Software

### **Sample homogenization and spotting**

1. Homogenize anemone in 500  $\mu\text{l}$  to 1 ml of 0.01% SDS in  $\text{dH}_2\text{O}$  using a rotor-stator or Kontes tissue grinder (#20 with Teflon pestle) and needle shearing.
2. If quantifying total protein using the BCA assay, be sure to save some of the homogenate.
3. Dilute tissue homogenate to achieve 10-100 algae  $\mu\text{l}^{-1}$ .
  - a. To calculate dilution factor, either:
    - i. Estimate the algal population within the anemone, OR
    - ii. When all samples are homogenized, spot 1  $\mu\text{l}$  of each homogenate on a glass slide and visualize under the microscope (see below).
4. Thoroughly clean a glass microscope slide with ethanol, and spot the homogenate on the slide (at least 20-24 1  $\mu\text{l}$  spots).
5. Air-dry the slide in a clean environment for at least 1 hour. You should see faint outlines from the dried spots.

### **Microscope**

6. Power up the microscope and the fluorescent bulb.
7. Turn on blue excitation / GFP filter cube. Use 20-30x magnification, making sure the spot fills the entire viewing field.
8. Use the following settings on the microscope: gain: 8.1; exposure: 2 s; gamma: 1.29, saturation: 1.0.
9. Make sure all light is going to the camera. Take pictures using the default camera settings (24 bit pictures). Label pictures and save to a known location.

### **Picture processing**

10. Load picture into *ImageJ* (<http://rsbweb.nih.gov/ij/>). Follow either of the following counting protocols (manual or automated).
  - a. Manual:

- i. Download the plug-in “Cell Counter”
    - ii. Use “Cell Counter” to manually click on dinoflagellates in each picture (dinoflagellates will appear as red dots). Record counts per picture.
  - b. Automated:
    - i. Use program Dinofinder by Matt Burriesci (details to follow)
11. Calculate dinoflagellates per anemone, taking into account statistics of picture counting, dilution factor, etc.

### **Instructions for using Dinofinder10**

Tested on Windows XP, Vista, Mac OSX, Ubuntu 7 and later.

To install Dinofinder10:

1. Install *ImageJ* on your system from <http://rsbweb.nih.gov/ij/>
2. Copy the *Dinofinder10\_.java* file into (directory\_structure)/imagej/plugins folder
3. Open *ImageJ* – you may need to rightclick → run as admin on Windows Vista to allow compilation.
4. File → Open your picture
5. Plugins → Compile and Run. Then select *Dinofinder10\_* (after one successful run it should be available as an option in the Plugins menu next time *ImageJ* is opened).
6. Now a screen should pop up with some options, just click OK to use the default settings. This will change the original image, so make a copy or do not save the changes after the image is processed.
7. A few seconds later the image should change and have some green with blue pixels. A file called “output.txt” should be in your *ImageJ* directory and it will contain information on each identified cell. The image itself now has green on any pixels that could have been part of cells and clue where *Dinofinder* decided a cell was. *Dinofinder* also should have removed any green channel contamination in the original image (Figure S1).
8. The options in the *Dinofinder* dialogue box are:
  - a. Minimum Cell Radius: The minimum number of pixels on each side of a center

pixel that are expected to be above background.

- b. Maximum Cell Radius: The maximum for the parameter above. Together, these two allow the computer to determine the difference between a brighter dinoflagellate and two rather close dinoflagellates.
- c. Minimum Red Intensity of Red Cells: This takes a number between 0 and 255. You can find the red intensities of outer fringes of cells as the first number in the “value” field of the *ImageJ* main window when you have a cursor over an image before you run Dinofinder. The background is 20 to 30, so 35 works pretty well on images from the microscope used in this study.

- d. Surrounding Cutoff: This takes a value  $x$ - if 0 is the center of the pixel below

1 2 3

4 0 5

6 7 8

Then the red values of at least  $x$  of the pixels 1 to 8 must be below that of pixel 0.

- e. Cumulative Total: This is similar to above. It takes pixels 1-8 and draws a 3x3 grid with them, then does the surrounding cutoff value calculation for each of 1-8 and then sums the results. These two statistics allow the effects of differences in local brightness across the image to be minimized.
- f. Filename Without Extension: Name of text output file with data for each cell. New data should be appended (running Dinofinder 10 times should just keep adding data to this file).
- g. Filepath: Specify a particular filepath if you don't want the output file to be saved in the *ImageJ* folder.
- h. Other Features:
  - i. Allows regions of interest selection: Select a sub-set of pixels on the screen with the wand or selection tools before running Dinofinder.
  - ii. Images can be run on stacks: Use *ImageJ* to automatically load a stack and

it will go through each image and compute.
